# Supplementary material
Source: Springer Nature journal article supplement (https://www.springermedizin.de/resource/supplementary/12888_2009_704_MOESM5_ESM.pdf/9478212)

**Symptom Severity at LOCF**

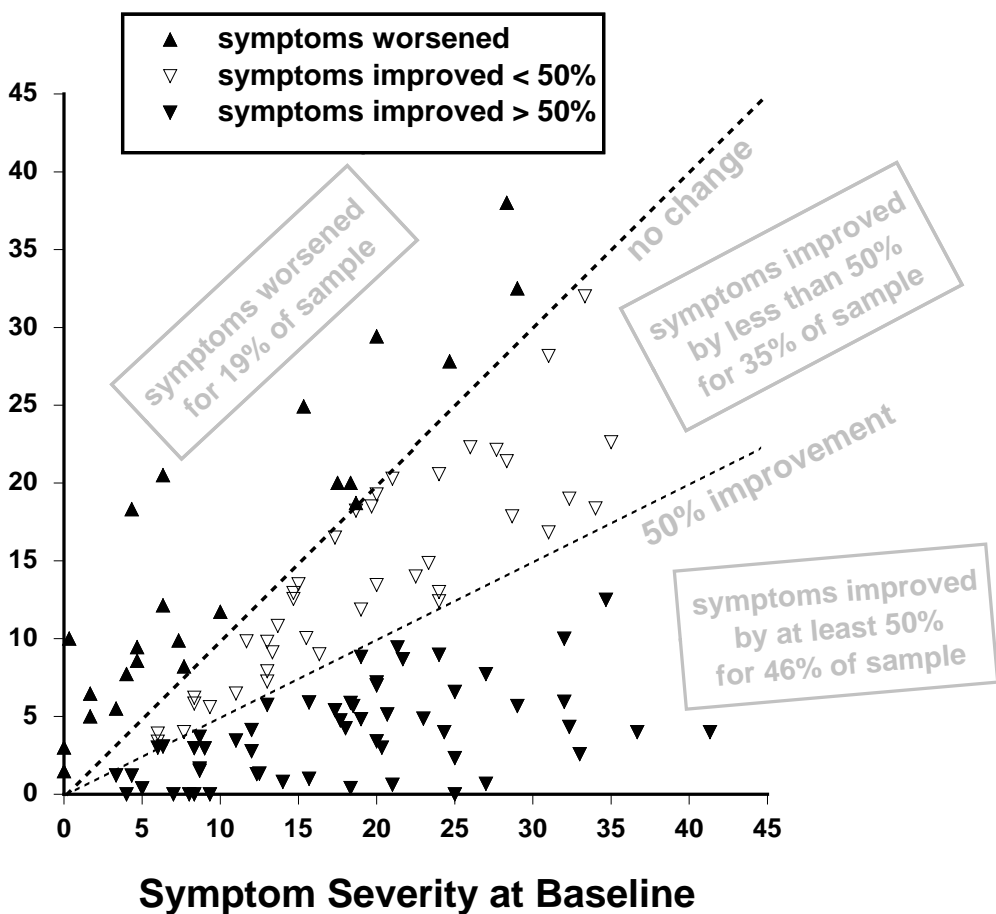

Supplement: MOESM5 [file 9478212]
